# Supplementary figures and images for: The synthesis of molecular imprinted chitosan-gels copolymerized with multiform functional monomers at three different temperatures and the recognition for the template ovalbumin
Source: Royal Society of Chemistry journal article supplement (doi:10.1039/c3an36930g), 2013-01-01

Fig\_S1

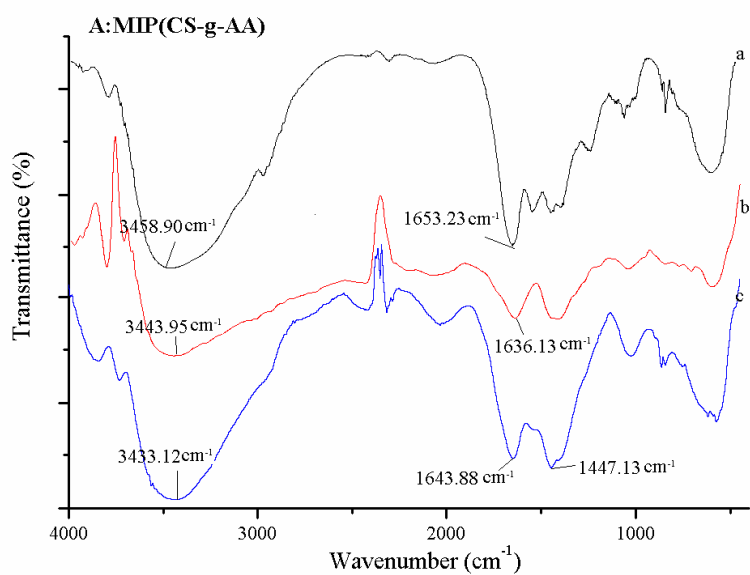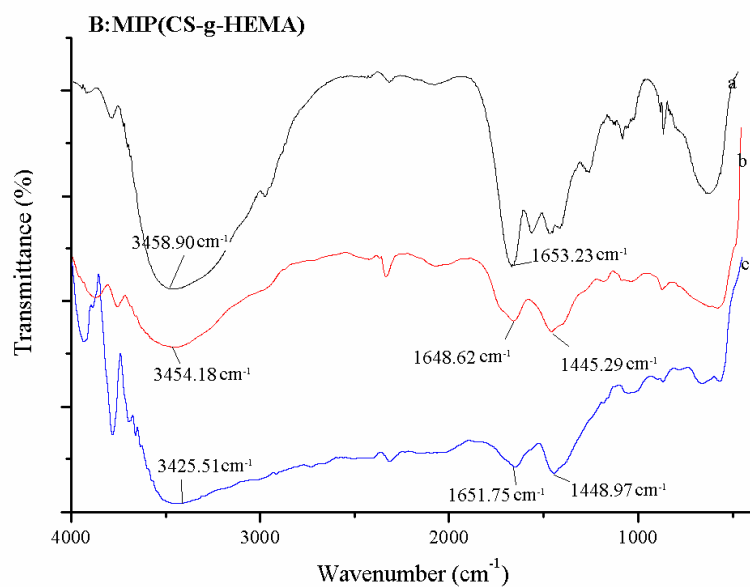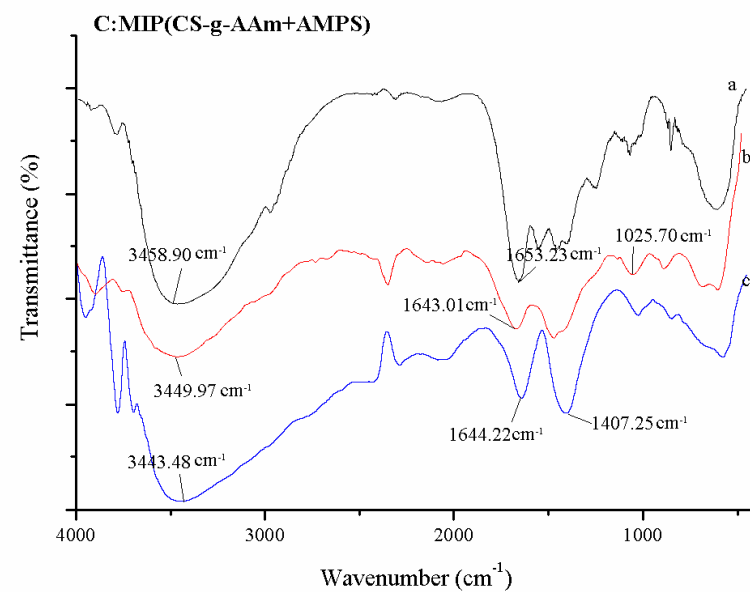

Supplement: c3an36930g.pdf [file c3an36930g.pdf]
